# Supplementary material for: Description of a new horned toad of Megophrys Kuhl & Van Hasselt, 1822 (Amphibia, Megophryidae) from Zhejiang Province, China
Source: Zookeys. 2020 Dec 18;1005:73–102. doi: 10.3897/zookeys.1005.58629 (PMC7765747; doi:10.3897/zookeys.1005.58629)
Supplement: Supplementary material 1 — Table S1 [file zookeys-1005-073-s001.xlsx]

## Sheet: Sheet1
Table S1. Measurements of the adult specimens of Megophrys baishanzuensis sp. nov. and M. kuatunensis. Units given in mm. See abbreviations for the morphological characters in Materials and methods section.
Species	Voucher number	Locality	Sex	SVL	HDL	HDW	SL	SNT	IND	IOD	UEW	ED	TYD	LAL	HAL	LW	FIL	FIIL	FIIIL	FIVL	THL	TL	TW	TFL	FL
Megophrys baishanzuensis sp. nov.	CIBQY20200719001	Baishanzu National Park, Qingyuan County, Zhejiang Province, China	Male	32.37	8.84	10.49	4.06	1.65	3.22	3.06	2.36	3.7	1.9	14.17	7.03	2.32	2.24	2.71	4.4	2.85	13.52	14.79	3.11	20.3	12.34
Megophrys baishanzuensis sp. nov.	CIBQY20200726002	Baishanzu National Park, Qingyuan County, Zhejiang Province, China	Male	31.48	8.83	10.48	3.98	1.53	3.07	3.29	2.62	3.7	1.73	14.23	7.48	2.37	2.77	2.95	5.1	3.09	13.19	14.88	4.18	20.43	11.67
Megophrys baishanzuensis sp. nov.	CIBQY20200719004	Baishanzu National Park, Qingyuan County, Zhejiang Province, China	Male	28.38	8.77	10.15	3.45	2.44	3.69	2.75	2.61	3.73	1.9	13.89	6.62	2.7	2.66	2.52	4.33	2.57	12.16	12.79	3.01	17.79	11.78
Megophrys baishanzuensis sp. nov.	CIBQY20200719003	Baishanzu National Park, Qingyuan County, Zhejiang Province, China	Male	30.09	9.06	9.32	3.68	1.64	3.28	2.93	2.58	3.96	1.53	14.59	6.91	2.3	2.44	2.43	4.53	2.7	13.32	14.06	3.47	19.89	12.3
Megophrys baishanzuensis sp. nov.	CIBQY20200726001	Baishanzu National Park, Qingyuan County, Zhejiang Province, China	Male	28.5	7.97	10.31	4.13	2.07	3.48	3.03	2.3	3.67	2.05	13.39	6.8	2.15	2.53	2.97	4.62	3.25	12.77	13.01	2.68	18.86	11.19
Megophrys baishanzuensis sp. nov.	CIBQY20200719002	Baishanzu National Park, Qingyuan County, Zhejiang Province, China	Male	32.26	8.45	10.43	3.39	2.59	3.71	3.02	2.99	3.76	1.66	14.63	7.86	2.6	2.46	2.85	4.73	3.59	12.44	14.09	3.29	19.48	11.86
Megophrys kuatunensis	CIBWY18082408	Wuyi Mountain, Wuyishan City, Fujian Province, China	Male	29.2	9.44	9.8	3.61	1.95	3.03	2.54	2.81	3.47	1.38	12.53	7.52	2.07	2.67	2.85	4.13	2.8	13.24	13.23	3.12	17.27	11.85
Megophrys kuatunensis	CIBWY18082407	Wuyi Mountain, Wuyishan City, Fujian Province, China	Male	29.46	9.94	10.04	3.68	2.03	3.34	2.38	2.82	3.44	1.69	13.01	7.16	1.9	2.59	2.83	4.74	3.29	13.66	13.94	2.94	17.34	11.41
Megophrys kuatunensis	CIBWY18082411	Wuyi Mountain, Wuyishan City, Fujian Province, China	Male	28.85	10	10.59	3.59	1.89	3.14	2.69	2.71	3.59	1.74	13.09	6.71	2.15	2.4	2.81	3.96	2.79	13.31	13.35	3.18	17.4	11.63
Megophrys kuatunensis	CIBWY18082413	Wuyi Mountain, Wuyishan City, Fujian Province, China	Male	29.08	4.04	9.93	3.85	2	3.25	2.19	2.63	3.42	1.8	12.84	7.1	2.47	2.3	2.35	4.01	2.63	11.87	13.32	3.21	17.22	11.39
Megophrys kuatunensis	CIBWY18082415	Wuyi Mountain, Wuyishan City, Fujian Province, China	Male	30.35	10.91	11.05	3.57	1.98	3.48	2.37	3.21	3.16	2.05	13.62	7.76	2.17	2.58	2.76	4.3	3.09	12.89	14.36	3.26	17.7	12.68
Megophrys kuatunensis	CIBWY18082410	Wuyi Mountain, Wuyishan City, Fujian Province, China	Male	29.1	9.42	10.24	3.75	1.87	3.29	3.33	2.93	3.82	1.38	13.38	7.04	2.32	2.55	2.6	4.28	2.93	12.5	13.11	3.4	18.07	11.36
